# Supplementary material
Source: PubMed Central journal article supplement (PMC1690686)
Supplement: 10983834s01.pdf [file 10983834s01.pdf]

This is an appendix to the paper by Taylor 2000 Maximum force production: why are crabs so strong? *Proc. R. Soc. Lond. B* **267**, 1475–1480.

Electronic appendices are refereed with the paper. However, no attempt has been made to impose a uniform editorial style on the electronic appendices.

Appendix A. Muscle stress and sarcomere length values for species used in the scaling analysis. Four stress values for *Menippe mercenaria* claws were not included in the analysis, because no sarcomere lengths (SL) were reported.

| Taxa      |                              | Ref.    | Body Region   | Muscle        | Sarcomere Length ( $\mu\text{m}$ ) |             |           | Maximum Stress ( $\text{kN m}^{-2}$ ) |            |        |        |
|-----------|------------------------------|---------|---------------|---------------|------------------------------------|-------------|-----------|---------------------------------------|------------|--------|--------|
| Species   | Mean (SE)                    |         |               |               | Range                              | <i>n</i>    | Mean (SE) | Range                                 | <i>n</i>   | Method |        |
| Crustacea |                              |         |               |               |                                    |             |           |                                       |            |        |        |
|           | <i>Cancer antennarius</i>    | 1       | chela crusher | dactyl closer | 13.7 (0.32)                        | 10.7 - 17.1 | 27        | 866 (35)                              | 551 - 1182 | 24     | vv,w,s |
|           | <i>Cancer branneri</i>       | 1       | chela crusher | dactyl closer | 12.7 (0.27)                        | 11.5 - 13.7 | 9         | 1032 (62)                             | 713 - 1536 | 12     | vv,w,s |
|           | <i>Cancer gracilis</i>       | 1       | chela crusher | dactyl closer | 12.7 (0.36)                        | 9.6 - 14.7  | 15        | 526 (29)                              | 383 - 743  | 14     | vv,w,s |
|           | <i>Cancer magister</i>       | 1       | chela crusher | dactyl closer | 12.2 (0.26)                        | 10.0 - 15.3 | 26        | 756 (28)                              | 519 - 963  | 20     | vv,w,s |
|           | <i>Cancer oregonensis</i>    | 1       | chela crusher | dactyl closer | 16.5 (0.36)                        | 14.2 - 17.1 | 9         | 1007 (30)                             | 817 - 1346 | 21     | vv,w,s |
|           | <i>Cancer productus</i>      | 1       | chela crusher | dactyl closer | 16.1 (0.26)                        | 14.4 - 17.8 | 13        | 792 (60)                              | 421 - 1224 | 15     | vv,w,s |
|           | <i>Cancer pagurus</i>        | 2       | chela crusher | dactyl closer | 12.8 (0.39)                        | 9 - 14      | 5         | 496 (321)                             | 320 - 720  | 18     | vt,w,c |
|           | <i>M. mercenaria</i> (temp)‡ | 3       | chela crusher | dactyl closer | --                                 | --          | --        | 1094 (95)                             | 157 - 2187 | 26     | vv,w,s |
|           | <i>M. mercenaria</i> (temp)‡ | 3       | chela cutter  | dactyl closer | --                                 | --          | --        | 673 (100)                             | --         | 7      | vv,w,s |
|           | <i>M. mercenaria</i> (trop)‡ | 3       | chela crusher | dactyl closer | --                                 | --          | --        | 711 (135)                             | 110 - 1702 | 12     | vv,w,s |
|           | <i>M. mercenaria</i> (trop)‡ | 3       | chela cutter  | dactyl closer | --                                 | --          | --        | 896 (90)                              | --         | 6      | vv,w,s |
|           | <i>Carcinus maenas</i>       | 4       | chela crusher | dactyl closer | 13.1 (--)                          | --          | 2         | 667 (580)                             | 286 - 1057 | 16     | vt,w,e |
|           | <i>Carcinus maenas</i>       | 4       | chela cutter  | dactyl closer | 9.5 (--)                           | --          | 2         | 474 (410)                             | 172 - 779  | 15     | vt,w,e |
|           | <i>Macropipus</i> spp        | 2       | chela crusher | dactyl closer | 8.9 (0.23)                         | 7 - 9       | 4         | 275 (422)                             | --         | 6      | vt,w,c |
|           | <i>Macropipus</i> spp        | 2       | chela cutter  | dactyl closer | 7.5 (0.21)                         | 3 - 5       | 4         | 268 (246)                             | --         | 7      | vt,w,c |
|           | <i>Callinectes sapidus</i>   | 5       | chela crusher | dactyl closer | 11.2 (0.03)                        | 6 - 15      | 3         | 638 (178)                             | --         | 18     | vv,w,s |
|           | <i>Callinectes sapidus</i>   | 5       | chela cutter  | dactyl closer | 10.5 (0.09)                        | 6 - 15      | 3         | 514 (143)                             | --         | 18     | vv,w,s |
|           | <i>C. opilio</i> (mature)    | 6       | chela cutter  | dactyl closer | 10.4 (--)                          | 4 - 17      | --        | 552 (24)                              | --         | 12     | vv,w,s |
|           | <i>C. opilio</i> (immature)  | 6       | chela cutter  | dactyl closer | 9.5 (--)                           | 4 - 17      | --        | 444 (29)                              | --         | 13     | vv,w,s |
|           | <i>Homarus americanus</i>    | 7 & 8   | chela crusher | dactyl closer | 7.6 (--)                           | 6 - 10      | --        | 302 (--)                              | 253 - 390  | 3      | vv,w,s |
|           | <i>Homarus americanus</i>    | 7 & 8   | chela cutter  | dactyl closer | 4.2 (--)                           | 2 - 10      | --        | 272 (--)                              | 182 - 426  | 8      | vv,w,s |
|           | <i>Cherax destructor</i>     | 9       | chela cutter  | dactyl closer | 8.6 (0.11)                         | 6 - 10      | 49        | 305 (17)                              | 100 - 571  | 49     | vt,f,c |
|           | <i>Cherax destructor</i>     | 9       | chela cutter  | dactyl closer | 3.3 (0.32)                         | 2 - 5       | 64        | 186 (8.0)                             | 57 - 278   | 64     | vt,f,c |
|           | <i>Astacus fluviatilis</i>   | 10      | walking leg   | extensor      | 10.5 (0.3)                         | --          | --        | 648 (--)                              | 0.0 - 804  | --     | vt,f,c |
|           | <i>Homarus americanus</i>    | 11      | adominal      | MSE           | 6.8 (0.37)                         | 6 - 10      | 25        | 443 (76)                              | --         | 4      | vt,b,c |
|           | <i>Homarus americanus</i>    | 11      | adominal      | LDE           | 2.4 (0.19)                         | 2 - 4.5     | 25        | 82 (15)                               | --         | 3      | vt,b,c |
|           | <i>Homarus americanus</i>    | 12 & 13 | 2nd antenna   | slow remotor  | 10.5 (--)                          | 8 - 13      | 20        | 275 (--)                              | --         | --     | vt,w,e |

(Appendix A: continued)

| Taxa       |                                | Ref.    | Body Region  | Muscle               | Sarcomere Length ( $\mu\text{m}$ ) |           |           | Maximum Stress ( $\text{kN m}^{-2}$ ) |           |        |        |
|------------|--------------------------------|---------|--------------|----------------------|------------------------------------|-----------|-----------|---------------------------------------|-----------|--------|--------|
| Species    | Mean (SE)                      |         |              |                      | Range                              | <i>n</i>  | Mean (SE) | Range                                 | <i>n</i>  | Method |        |
| Uniramia   |                                |         |              |                      |                                    |           |           |                                       |           |        |        |
|            | <i>Schistocerca gregaria</i>   | 15      | hindwing     | flight               | 3.9 (-)                            | 3.1 - 4.1 | --        | 157 (-)                               | --        | --     | vt,b,e |
|            | <i>Schistocerca gregaria</i> § | 16      | wing         | metathoracic         | 3.9 (-)                            | --        | --        | 295 (23)                              | --        | 12     | vv,w,e |
|            | <i>Schistocera americana</i> § | 17      | wing         | metathoracic         | 3.9 (-)                            | --        | --        | 363 (14)                              | --        | 5      | vv,w,e |
|            | <i>N. robustus</i> ¥           | 18      | singing/wing | mesothoracic         | 3.3 (0.3)                          | --        | 3         | 109 (-)                               | --        | 7      | vv,w,e |
|            | <i>N. robustus</i> ¥           | 18      | wing         | metathoracic         | 3.1 (0.3)                          | --        | 3         | 240ç (-)                              | --        | 5      | vv,w,e |
|            | <i>N. triops</i> §¥            | 18      | singing/wing | mesothoracic         | 3.3 (-)                            | --        | --        | 124ç (-)                              | --        | 6      | vv,w,e |
|            | <i>N. triops</i> §¥            | 18      | wing         | metathoracic         | 3.1 (-)                            | --        | --        | 214ç (-)                              | --        | 6      | vv,w,e |
|            | <i>Schistocerca gregaria</i> † | 19 & 20 | hind leg     | tibia extensor       | 11.0 (-)                           | --        | --        | 705 (-)                               | 660 - 750 | --     | vv,w,e |
| Vertebrata |                                |         |              |                      |                                    |           |           |                                       |           |        |        |
|            | <i>Scyliorhinus canicula</i>   | 21      | postanal     | myotomal white       | 2.6 (-)                            | 2.3 - 2.8 | --        | 241 (22)                              | --        | 7      | vt,b,e |
|            | <i>Cyprinus carpio</i>         | 22      | mid-line     | myotomal red         | 2.1 (-)                            | --        | --        | 116 (4)                               | 102 - 125 | 5      | vt,b,e |
|            | <i>Makaira nigricans</i>       | 23      | trunk        | myotomal white       | 2.3 (-)                            | --        | --        | 176 (2)                               | --        | 13     | vt,f,c |
|            | <i>Makaira nigricans</i>       | 23      | trunk        | myotomal red         | 2.3 (-)                            | --        | --        | 57 (9)                                | --        | 11     | vt,b,c |
|            | <i>Xenopus laevis</i>          | 24      | hind leg     | IL (1N fibres)       | 2.3 (-)                            | --        | --        | 396 (54)                              | --        | 10     | vt,f,e |
|            | <i>Xenopus laevis</i>          | 24      | hind leg     | IL (2S fibres)       | 2.3 (-)                            | --        | --        | 337 (38)                              | --        | 12     | vt,f,e |
|            | <i>Xenopus laevis</i>          | 24      | hind leg     | IL (2F fibre)        | 2.3 (-)                            | --        | --        | 312 (36)                              | --        | 6      | vt,f,e |
|            | <i>Xenopus laevis</i>          | 24      | hind leg     | IL (2N fibres)       | 2.3 (-)                            | --        | --        | 300 (49)                              | --        | 8      | vt,f,e |
|            | <i>Pseudemys scripta</i>       | 25      | hind leg     | IL (fast glycolytic) | 2.3 (-)                            | --        | --        | 183 (5)                               | --        | 17     | vt,f,s |
|            | <i>Pseudemys scripta</i>       | 25      | hind leg     | IL (fast oxidative)  | 2.3 (-)                            | --        | --        | 120 (3)                               | --        | 16     | vt,f,s |
|            | <i>Pseudemys scripta</i>       | 25      | hind leg     | IL (slow oxidative)  | 2.3 (-)                            | --        | --        | 71 (3)                                | --        | 19     | vt,f,s |
|            | <i>Rattus</i> spp.             | 26      | hind leg     | EDL                  | 2.5 (-)                            | --        | --        | 209 (10.7)                            | --        | 8      | vt,b,e |
|            | <i>Rattus</i> spp.             | 26      | hind leg     | soleus               | 2.5 (-)                            | --        | --        | 198 (19)                              | --        | 8      | vt,b,e |
|            | albino mice                    | 27      | extraocular  | inferior rectus      | 2.6 (0.12)                         | --        | 6         | 102 (11)                              | --        | 6      | vt,w,e |
|            | albino mice                    | 27      | hind leg     | EDL                  | 3.1 (0.14)                         | --        | 6         | 249 (10)                              | --        | 6      | vt,w,e |

(Appendix: continued)

| Taxa       |                      | Ref.    | Body Region | Muscle        | Sarcomere Length ( $\mu\text{m}$ ) |          |           | Maximum Stress ( $\text{kN m}^{-2}$ ) |           |        |        |
|------------|----------------------|---------|-------------|---------------|------------------------------------|----------|-----------|---------------------------------------|-----------|--------|--------|
| Species    | Mean (SE)            |         |             |               | Range                              | <i>n</i> | Mean (SE) | Range                                 | <i>n</i>  | Method |        |
| Vertebrata |                      |         |             |               |                                    |          |           |                                       |           |        |        |
|            | albino mice          | 27      | hind leg    | soleus        | 2.8 (0.08)                         | --       | 6         | 177 (22)                              | --        | 6      | vt,w,e |
|            | albino mice          | 27      | diaphragm   | hemidiaphragm | 2.7 (0.09)                         | --       | 6         | 211 (9)                               | --        | 6      | vt,b,e |
|            | <i>Homo sapien</i> ¶ | 28 & 29 | hind leg    | triceps surae | 2.7 (--)                           | --       | --        | 120 (4)                               | 101 - 151 | 5      | vv,w,s |
|            | <i>Homo sapien</i> ¶ | 28 & 29 | hind leg    | quadriceps    | 2.7 (--)                           | --       | --        | 239.4 (8)                             | 191 - 277 | 5      | vv,w,s |
|            | <i>Homo sapien</i> ¶ | 28 & 29 | hind leg    | hip extensors | 2.7 (--)                           | --       | --        | 127.4 (8)                             | 74 - 187  | 5      | vv,w,s |

Method symbols: vv = in vivo, vt = in vitro, w = whole muscle, b = bundle of fibres, f = single fibres, e = stimulated electrically, c = stimulated chemically, s = self stimulated. Muscle abbreviations: MSE = medial superficial extensor, LDE = lateral deep extensor, IL = iliofibularis, EDL = extensor digitorum longus. Species abbreviations: *M. mercenaria* = *Menippe mercenaria*, *C. opilis* = *Chionoecetes opilio*, *N. robustus* = *Neoconocephalus robustus*, *N. tripos* = *Neoconocephalus triops*. ‡ sarcomere length measurements are not available for claws of *M. mercenaria* crabs. However, mean claw mechanical advantage is reported at 0.390 (N = 77) for the crusher and 0.304 (N = 29) for the cutter (Blundun, 1988). Using the regression in figure A2-3 (MA verses SL;  $y = 25.858x + 4.8104$ ), an average SLs of 14.9  $\mu\text{m}$  for the crusher and 12.7  $\mu\text{m}$  for the cutter-claw were predicted. Assuming these SL's are reasonable estimates, the mean stress of both claw types are within the 95% confidence limits of the regression, resting SL verses maximum stress (Fig. A2-2).

§ sarcomere length assumed to be the same as found for a closely related species.

¥ stress has been corrected for myofibril area.

† only A-band length measured, therefore sarcomere length estimated by doubling this value.

¶ sarcomere length estimated by taking the mean sarcomere length for mammalian muscles referenced in Josephson (1993).

Ref.= references, temp = temperate, trop = tropical

**References:** **01)** Taylor, (data presented here); **02)** Warner & Jones, 1976; **03)** Blundon, 1988; **04)** Warner *et al.*, 1982; **05)** Govind & Blundon, 1985; **06)** Claxton, *et al.*, 1994; **07)** Govind, 1984; **08)** Elner & Campbell, 1981; **09)** West *et al.*, 1992; **10)** Zachar, & Zacharova, 1966; **11)** Jahromi, & Atwood, 1969; **12)** Mendelson, 1969; **13)** Bevingut, *et al.*, 1993; **14)** Griffiths, *et al.*, 1990; **15)** Weis-Fogh, 1956; **16)** Malamud, *et al.*, 1988; **17)** Malamud, & Josephson, 1991; **18)** Josephson, 1984; **19)** Bennet-Clark, 1975; **20)** Cochrane, *et al.*, 1972; **21)** Curtin & Woledge, 1988; **22)** Rome & Sosnicki, 1990; **23)** Johnston & Salamonski, 1984; **24)** Lännergren, 1987; **25)** Mutungi, & Johnston, 1987; **26)** Ranatunga, 1984; **27)** Luff, A.R. 1981; **28)** Thorpe *et al.*, 1998; **29)** Josephson, 1993.

- Bennet-Clark, H. C. 1975 The energetics of the jump of the locust *Schistocerca gregaria*. *J. Exp. Biol.* **63**, 53--63.
- Bevengut, M., McTeague, J. A. & Govind, C. K. 1993 Fiber composition of antennal muscles in the lobster *Homarus americanus* and the crayfish *Procambarus clarkii*. *J. Crust. Biol.* **13**, 256--267.
- Blundon, J. A. 1988 Morphology and muscle stress of chelae of temperate and tropical stone crabs *Menippe mercenaria*. *J. Zool. Lond.* **215**, 663--673.
- Claxton, W. T., Govind, C. K. & Elner, R. W. 1994 Chela function, morphometric maturity, and the mating embrace in male snow crab, *Chionoecetes opilio*. *Can. J. Fish. Aquat. Sci.* **51**, 1110--1118.
- Cochrane, D. G., Elder, H. Y. & Usherwood, P. N. R. 1972 Physiology and ultrastructure of phasic and tonic skeletal muscle fibres in the locust, *Schistocerca gregaria*. *J. Cell Sci.* **10**, 419--441.
- Curtin, N. A. & Woledge, R. C. 1988 Power output and force--velocity relationship of live fibres from white myotomal muscle of dogfish, *Scyliorhinus canicula*. *J. Exp. Biol.* **140**, 187--197.
- Elner, R. W. & Campbell, A. 1981 Force, function and mechanical advantage in the chelae of the American lobster *Homarus americanus* (Decapoda: Crustacea). *J. Zool. Lond.* **193**, 269--286.
- Govind, C. K. 1984 Development of asymmetry in the neuromuscular system of lobster claws. *Biol. Bull.* **167**, 94--119.
- Govind, C. K. & Blundon, J. A. 1985 Form and function of the asymmetric chelae in blue crabs with normal and reversed handedness. *Biol. Bull.* **168**, 321--331.
- Griffiths, P. J., Duchateau, J. J., Maeda, Y., Potter, J. D. & Ashley, C. C. 1990 Mechanical characteristics of skinned and intact muscle fibers from giant barnacle, *Balanus nubilus*. *Pflügers Arch.* **415**, 554--565.
- Jahromi, S. S. & Atwood, H. L. 1969 Correlation of structure, speed of contraction, and total tension in fast and slow abdominal muscle fibers of the lobster (*Homarus americanus*). *J. Exp. Zool.* **171**, 25--38.
- Johnston, I. A. & Salamonski, J. 1984 Power output and force--velocity relationship of red and white muscle fibres from the Pacific blue marlin (*Makaira nigricans*). *J. Exp. Biol.* **111**, 171--177.
- Josephson, R. K. 1984 Contraction dynamics of flight and stridulatory muscles of tettigoniid insects. *J. Exp. Biol.* **108**, 77--96.
- Josephson, R. K. 1993 Contraction dynamics and power output of skeletal muscle. *A. Rev. Physiol.* **55**, 527--546.
- Lännergren, J. 1987 Contractile properties and myosin isoenzymes of various kinds of *Xenopus* twitch muscle fibres. *J. Muscle Res. Cell Motil.* **8**, 260--273.
- Luff, A. R. 1981 Dynamic properties of the inferior rectus, extensor digitorum longus, diaphragm and soleus muscle of the mouse. *J. Physiol. Lond.* **313**, 161--171.
- Malamud, J. G. & Josephson, R. K. 1991 Force--velocity relationships of a locust flight muscle at different times during a twitch contraction. *J. Exp. Biol.* **159**, 65--88.
- Malamud, J. G., Mizisin, A. P. & Josephson, R. K. 1988 The effects of octopamine on contraction kinetics and power output of a locust flight muscle. *J. Comp. Physiol. A* **162**, 827--835.
- Mendelson, M. 1969 Electrical and mechanical characteristics of a very fast lobster muscle. *J. Cell Biol.* **42**, 548--563.
- Mutungi, G. & Johnston, I. A. 1987 The effects of temperature and pH on the contractile properties of skinned muscle fibres from the terrapin, *Pseudemys scripta elegans*. *J. Exp. Biol.* **128**, 87--105.
- Ranatunga, K. W. 1984 The force--velocity relation of rat fast- and slow-twitch muscles examined at different temperatures. *J. Physiol.* **351**, 517--529.

- Rome, L. C. & Sosnicki, A. A. 1990 The influence of temperature on mechanics of red muscle in carp. *J. Physiol.* **427**, 151--169.
- Thorpe, S. K. S., Li, Y., Crompton, R. H. & Alexander, R. M. 1998 Stress in human leg muscles in running and jumping determined by force plate analysis and from published magnetic resonance images. *J. Exp. Biol.* **201**, 63--70.
- Warner, G. F. & Jones, A. R. 1976 Leverage and muscle type in crab chelae (Crustacea: Brachyura). *J. Zool. Lond.* **180**, 57--68.
- Warner, G. F., Chapman, D., Hawkey, N. & Waring, D. G. 1982 Structure and function of the chelae and chela closer muscles of the shore crab *Carcinus maenas* (Crustacea: Brachyura). *J. Zool. Lond.* **196**, 431--438.
- Weis-Fogh, T. 1956 Tetanic force and shortening in locust flight muscle. *J. Exp. Biol.* **33**, 668--684.
- West, J. M., Humphris, D. C. & Stephenson, D. G. 1992 Differences in maximal activation properties of skinned short- and long-sarcomere muscle fibres from the claw of the freshwater crustacean *Cherax destructor*. *J. Muscle Res. Cell Motil.* **13**, 668--684.
- Wray, J. S. 1979 Structure of the backbone in myosin filaments of muscle. *Nature* **277**, 37--40.
- Zachar, J. & Zacharova, D. 1966 The length--tension diagram of single muscle fibers of the crayfish. *Experienta* **22**, 451--452.
